# Supplementary figures and images for: Impact of maternal overweight and obesity on milk composition and infant growth
Source: PubMed Central journal article supplement — Matern Child Nutr. 2020 Feb 19;16(3):e12979. doi: 10.1111/mcn.12979 (PMC7296794; doi:10.1111/mcn.12979), 2020-02-19

**A**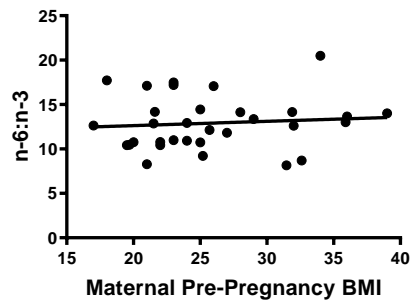**B**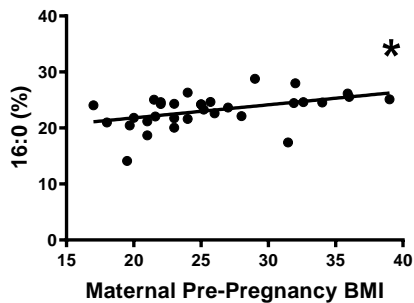**C**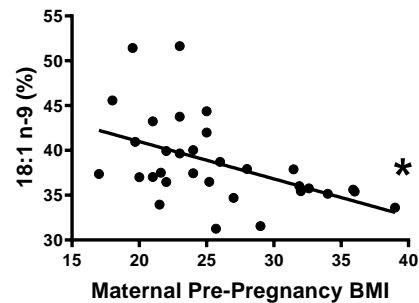**D**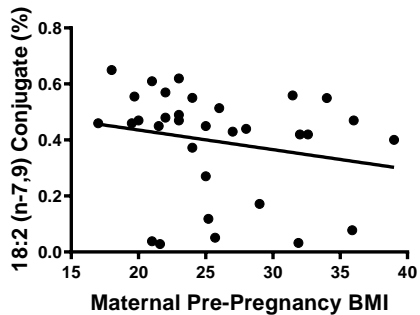**E**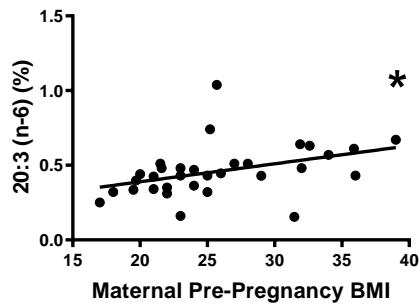**F**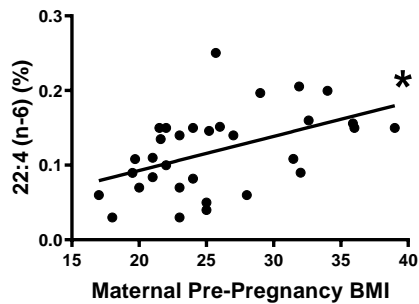**G**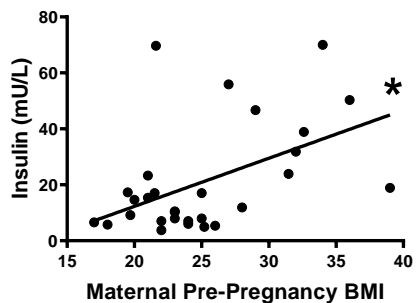**Figure S2.**

Supplement: MCN-16-e12979-s003.pdf [file MCN-16-e12979-s003.pdf]
